# Supplementary material
Source: Springer Nature journal article supplement (https://www.springermedizin.de/resource/supplementary/13058_2013_3261_MOESM5_ESM.pdf/9703714)

# Unsupervised hierarchical clustering, mRNA data

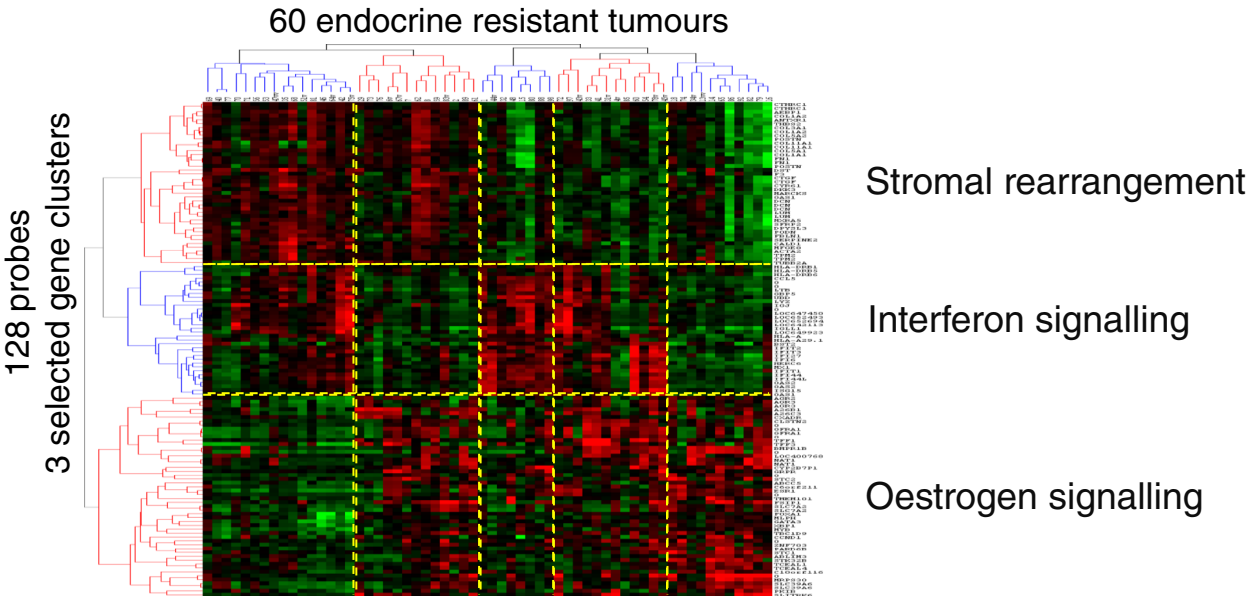

Supplement: MOESM5 [file 9703714]
